# Supplementary material
Source: PubMed Central journal article supplement (PMC3173189)
Supplement: supp_M111.221804_jbc.M111.221804-1.pdf [file supp_M111.221804_jbc.M111.221804-1.pdf]

**SUPPLEMENTAL TABLE 1:**  
**Primers generated for site-directed mutagenesis**

| <b>Mutation</b> | <b>Primer sequence</b>                                                                                          |
|-----------------|-----------------------------------------------------------------------------------------------------------------|
| <b>G1013R</b>   | 5' -GTGTCCGAGAGGACCC <b>A</b> GATTTGCCACAAAAG-3'<br>3' -CACAGGCTCTCCTGGG <b>T</b> CTAAACGGTGTTTTTC-5'           |
| <b>C1032Y</b>   | 5' -CTTCAAAGATATCAATGAG <b>G</b> GCAAGATGATACCCAGCC-3'<br>3' -GAAGTTTCTATAGTTACT <b>C</b> CGTTCTACTATGGGTCGG-5' |
| <b>I1048T</b>   | 5' -CAAGTGCAGAAACACC <b>C</b> TGGCAGCTTTAAGTGC-3'<br>3' -GTTCACGTCTTTGTGG <b>T</b> GACCGTCGAAATTCACG-5'         |
| <b>C1182S</b>   | 5' -GGAAGTATCAGTGTGCCT <b>C</b> CAACCCTGGCTACCATTC-3'<br>3' -CCTTCATAGTCACACGG <b>A</b> GGTTGGGACCGATGGTAAG-5'  |

The nucleotide exchanges are depicted in bold letters within the primers.
