# Supplementary material
Source: PubMed Central journal article supplement (PMC3173189)
Supplement: supp_M111.221804_jbc.M111.221804-2.pdf [file supp_M111.221804_jbc.M111.221804-2.pdf]

**SUPPLEMENTAL TABLE 2:  
Cleavage sites identified in rF20-WT**

| Cleavage Site |           | Position<br>in FBN1 | Module | Enzyme |
|---------------|-----------|---------------------|--------|--------|
| P4 - P1       | P1' - P8' |                     |        |        |
| CSIR          | NMCLNGMC  | 580                 | cbEGF5 | T      |
| AVGL          | DGRVCVDT  | 648                 | cbEGF6 | C      |
| LCPR          | GPGFATKE  | 1011                | TB3    | Th     |
| GKPF          | FKDINECK  | 1025                | TB3    | C      |
| PFFK          | DINECKMI  | 1027                | TB3    | P      |

For numbering of the amino acids, fibrillin-1 sequence NP\_000129.3 was used. The number for the position in FBN1 refers to the first residue after the cleavage site (P1'). Eight residues were identified in each N-terminal sequencing reaction which is sufficient to unambiguously identify the cleavage site (P1' - P8'). Cysteine can normally not be analyzed by Edman degradation. However, frequently the stable cysteine-acryl amid compound could be identified in the chromatograms (67). For trypsin and chymotrypsin, only cleavages sites corresponding to the consensus sites are indicated. Enzyme abbreviations: T, trypsin; C, chymotrypsin; P, plasmin; Th, thrombin.
